# Supplementary material for: Controllable synthesis of Ni3−xCoxS4nanotube arrays with different aspect ratios grown on carbon cloth for high-capacity supercapacitors
Source: Royal Society of Chemistry journal article supplement (doi:10.1039/c5ra06440f), 2015-01-01
Supplement: c5ra06440f1.pdf [file c5ra06440f1.pdf]

## **Supporting Information:**

**Controllable synthesis of  $\text{Ni}_{3-x}\text{Co}_x\text{S}_4$  nanotube arrays with different aspect ratios grown on carbon cloth for high-capacity supercapacitors**

**Rui Ding, Hong Gao<sup>\*</sup>, MingYi Zhang, Jing Zhang, XiTian Zhang<sup>\*</sup>**

*Key Laboratory for Photonic and Electronic Bandgap Materials, Ministry of Education, School of Physics and Electronic Engineering, Harbin Normal University, Harbin 150025, P. R. China.*

---

\* corresponding author: E-mail: [gaohong65cn@126.com](mailto:gaohong65cn@126.com), [xtzhangzhang@hotmail.com](mailto:xtzhangzhang@hotmail.com)

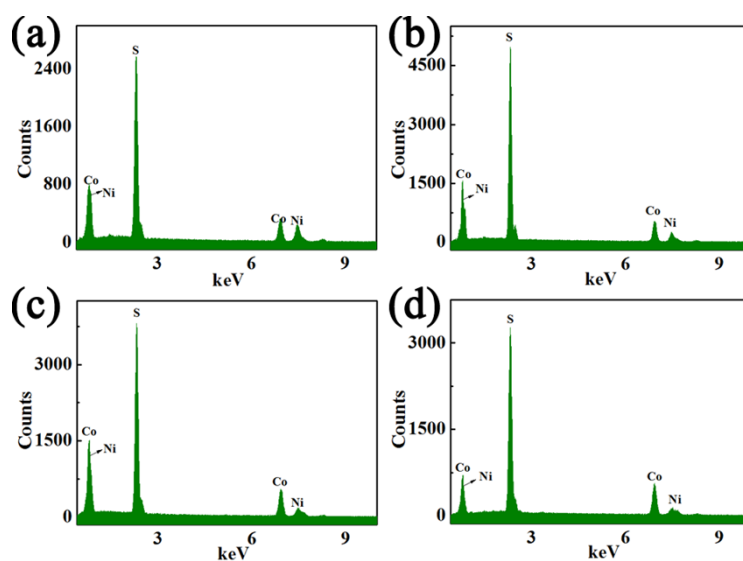

**Fig. S1** EDX of Ni-Co sulfides, (a) Co-1.5, (b) Co-2, (c) Co-2.25, (d) Co-2.5.

Table S1. EDX analysis results of the Co, Ni and S in the prepared Co-x

|         | Molar ratio in hydrothermal synthesis ( $\text{Ni}(\text{NO}_3)_2 \cdot 6\text{H}_2\text{O}$ and $\text{Co}(\text{NO}_3)_2 \cdot 6\text{H}_2\text{O}$ ) | Molar ratio in Co-x (Ni : Co : S) |
|---------|---------------------------------------------------------------------------------------------------------------------------------------------------------|-----------------------------------|
| Co-1.5  | 1:1                                                                                                                                                     | 20:21:59                          |
| Co-2    | 1:2                                                                                                                                                     | 14:29:57                          |
| Co-2.25 | 1:3                                                                                                                                                     | 10:31:59                          |
| Co-2.5  | 1:5                                                                                                                                                     | 8:37:55                           |

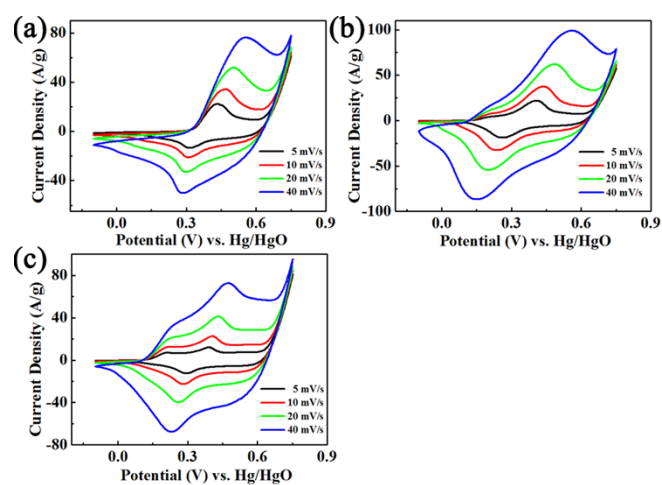

**Fig. S2** Cyclic voltammety curves of the Co-x at different scan rates in 3M KOH aqueous solution, respectively. (a) Co-1.5, (b) Co-2, (c) Co-2.5.

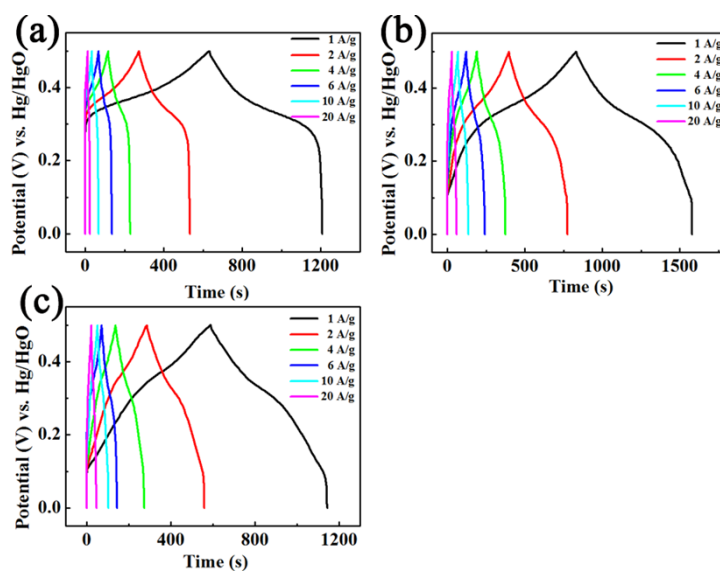

**Fig. S3** (a), (b), (c) Charge and discharge curves for Co-1.5, Co-2, and Co-2.5 at current densities from 1 to 20 A/g in 3M KOH aqueous solution, respectively.
